# Supplementary material for: Polyurethane derivatives for highly sensitive and selective fluorescence detection of 2,4,6-trinitrophenol (TNP)
Source: Royal Society of Chemistry journal article supplement (doi:10.1039/c8tc04250k), 2018-01-01
Supplement: c8tc04250k1.pdf [file c8tc04250k1.pdf]

---

## Supporting Information

### Polyurethane Derivatives for Highly Sensitive and Selective Fluorescent Detection of 2,4,6-Trinitrophenol (TNP)

Nan Jiang,<sup>‡<sup>a</sup></sup> Guangfu Li,<sup>‡<sup>a</sup></sup> Weilong Che,<sup>a</sup> Dongxia Zhu,<sup>\*<sup>a</sup></sup> Zhongmin Su<sup>\*<sup>a</sup></sup> and Martin R. Bryce<sup>\*<sup>b</sup></sup>

<sup>a</sup> Key Laboratory of Nanobiosensing and Nanobioanalysis at Universities of Jilin Province, Department of Chemistry, Northeast Normal University, 5268 Renmin Street, Changchun, Jilin Province 130024, P. R. China

<sup>b</sup> Department of Chemistry, Durham University, Durham, DH1 3LE, UK  
E-mail: m.r.bryce@durham.ac.uk

| <b>Table of Contents:</b>                                                        | <b>Page</b> |
|----------------------------------------------------------------------------------|-------------|
| 1. Experimental details                                                          | S2          |
| 2. Structural characterization of PUs                                            | S5          |
| 3. Photophysical properties and interactions of PUs with nitro-aromatic analytes | S7          |

## 1. Experimental details

### General

Materials obtained from commercial suppliers were used without further purification unless otherwise stated. All glassware, syringes, magnetic stirring bars, and needles were thoroughly dried in a convection oven.  $^1\text{H}$  NMR spectra were recorded at 25 °C on a Varian 500 MHz spectrometer and were referenced internally to the residual proton resonance in DMSO- $d_6$  ( $\delta$  2.5 ppm). The molecular weights of the polymers were calculated from their  $^1\text{H}$  NMR spectra. UV-vis absorption spectra were recorded on a Shimadzu UV-3100 spectrophotometer. Photoluminescence spectra were collected on an Edinburgh FLS920 spectrophotometer.

### Synthesis of PU Derivatives

**PU1.** A mixture of 2,5-dihydroxyterephthalic acid (2.62 mmol), polyethylene glycol mono-methyl ether ( $M_w = 200 \text{ g mol}^{-1}$ ; 1.98 mmol), anhydrous THF (8 mL), hexamethylene diisocyanate (3.61 mmol) and DABCO (0.105 mmol) were added to dried two-neck round-bottom flask. The solution was heated at 75°C for 8 h under nitrogen atmosphere. After the clear solution became significantly viscous, product precipitated from excess diethyl ether. Then the product was dried under vacuum for 24 h to obtain the resulting **PU1** Yield: 84.6%.  $^1\text{H}$  NMR (500 MHz, DMSO- $d_6$ ,  $\delta$  [ppm]): 12.41 (s, 2H), 7.01-7.95 (broad, 2H), 4.02 (s, 4H), 3.36-3.69 (broad, PEG protons), 3.23 (s, 6H; PEG terminal -OCH<sub>3</sub> protons), 2.63-2.98 (broad, 4H), 1.45 (broad, 4H), 1.29 (broad, 4H). FTIR: 3323  $\text{cm}^{-1}$ (N-H), 2859 and 2941 $\text{cm}^{-1}$ (-CH<sub>2</sub>- asymmetric and symmetric stretch), 1704 (C=O), 1193  $\text{cm}^{-1}$  (C-O-C stretch PEG). The molecular weight is 716  $\text{g mol}^{-1}$  calculated from the  $^1\text{H}$  NMR spectra.

**PU2.** The synthetic procedure for **PU2** was the same as **PU1**, except monomer hydroquinone (2.62 mmol) was used instead of 2,5-dihydroxyterephthalic acid. Yield: 83%.  $^1\text{H}$  NMR (500 MHz, DMSO- $d_6$ ,  $\delta$  [ppm]): 7.04-7.21 (broad, 4H ;), 4.03 (s, 4H), 3.39-3.61 (broad, PEG protons), 3.23 (s, 6H; PEG terminal -OCH<sub>3</sub> protons), 2.98 (broad, 4H), 1.41 (broad, 4H), 1.26 (broad, 4H). FTIR: 3326  $\text{cm}^{-1}$ (N-H), 2859 and 2942  $\text{cm}^{-1}$  (-CH<sub>2</sub>- asymmetric and symmetric stretching), 1705  $\text{cm}^{-1}$  (C=O), 1193  $\text{cm}^{-1}$  (C-O-C stretching PEG). The molecular weight is 1077  $\text{g mol}^{-1}$  calculated from the  $^1\text{H}$  NMR spectra.

**PU3.** The synthetic procedure of **PU3** was the same as **PU1**, except monomer 2, 7-dihydroxynaphthalene (2.62 mmol) was used instead of 2,5-dihydroxyterephthalic acid.

Yield: 80.5%.  $^1\text{H}$  NMR (500 MHz,  $\text{DMSO-}d_6$ ,  $\delta$  [ppm]): 7.04-7.95 (broad, 6H), 4.04 (broad, 4H), 3.45-3.62 (broad, PEG protons), 3.23 (s, 6H; PEG terminal  $-\text{OCH}_3-$  protons), 3.01 (s, 4H), 1.43 (s, 4H), 1.31 (s, 4H). FTIR:  $3322\text{ cm}^{-1}$  (N-H),  $2858$  and  $2940\text{ cm}^{-1}$  ( $-\text{CH}_2-$  asymmetric and symmetric stretching),  $1704\text{ cm}^{-1}$  (C=O),  $1191\text{ cm}^{-1}$  (C-O-C stretching PEG). The molecular weight is  $3112\text{ g mol}^{-1}$  calculated from the  $^1\text{H}$  NMR spectra.

### Procedure for the sensing studies in the solution

Stock solutions of nitro-aromatic compounds, namely, picric acid (TNP), nitrobenzene (NB), 2,4-dinitrophenol (2,4-DNP) p-nitrophenol (NP), trinitrotoluene (TNT), 4-nitrotoluene (NT), 2,4-dinitrotoluene (2,4-DNT) and 2,6-dinitrotoluene (2,6-DNT) were prepared in acetonitrile-water mixture (1:1 v/v) at concentrations of  $1 \times 10^{-3}\text{ M}$ , respectively. The absorption and fluorescence measurements of PUs ( $1 \times 10^{-5}\text{ M}$ ) were carried out by sequentially adding different nitro-aromatic compounds in a quartz cuvette ( $3\text{ cm} \times 3\text{ cm}$ ). The absorption and fluorescence spectra of the resultant mixtures were then recorded after mixing thoroughly at room temperature.

### Fluorescence quenching (%) measurement

The quenching percentage was calculated using the equation as follows:

$$\text{Fluorescence quenching \%} = (1 - I/I_0) \times 100\%$$

where  $I_0$  is the initial fluorescence intensity in the absence of analyte,  $I$  is the fluorescence intensity in the presence of corresponding analyte.

### Fluorescence quenching titration study

The Stern–Volmer relationship establishes the correlation of intensity changes with the quencher concentration  $[Q]$  as follows:

$$I_0/I = 1 + K_{SV}[Q]$$

where  $I_0$  and  $I$  are the intensity, in the absence and presence of TNP, respectively,  $K_{SV}$  is the Stern-Volmer quenching constant and  $[Q]$  is the concentration of TNP.

### Benesi–Hildebrand equation

$$1/(F_0 - F_i) = 1/\{K_a * (F_0 - F_{\text{Min}}) * [\text{PA}]\} + 1/(F_0 - F_{\text{Min}})$$

---

where,  $F_0$  is the fluorescence intensity of sensor,  $F_i$  is the fluorescence intensity obtained with TNP at different concentration,  $F_{\text{Min}}$  is the fluorescence intensity obtained with excess amount of TNP.

### **Lifetime measurements**

$$F(t) = \sum \alpha_i \exp(t / \tau_i)$$

Where,  $\alpha_i$  is a pre-exponential factor representing the fractional contribution to the time resolved decay of the component with a lifetime  $\tau_i$ .

### **Method for detection limit calculation**

The detection limit (LOD) was then calculated using the equation  $3\sigma/K$ , where  $\sigma$  is the standard deviation (SD) for PUs solution intensity in the absence of TNP and  $K$  denotes the slope of the curve.

## 2. Structural characterization of PUs

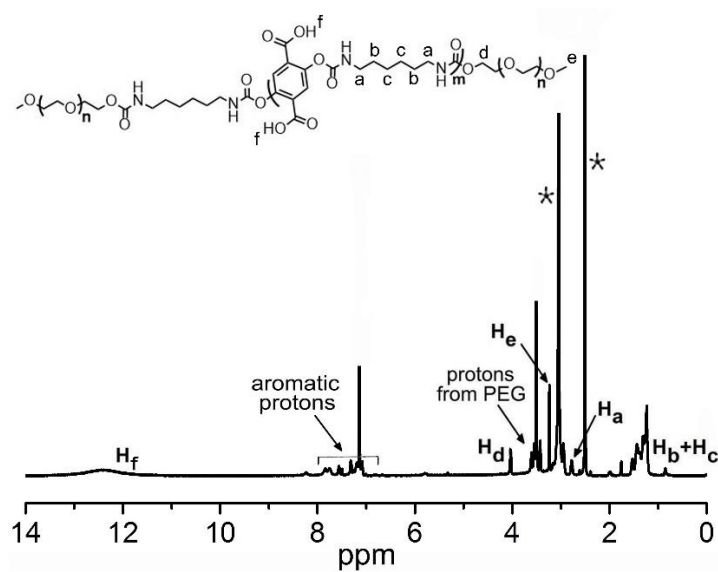

**Fig. S1** <sup>1</sup>H NMR spectrum of **PU1** in DMSO-*d*<sub>6</sub> (\* indicates peaks from the solvent and water)

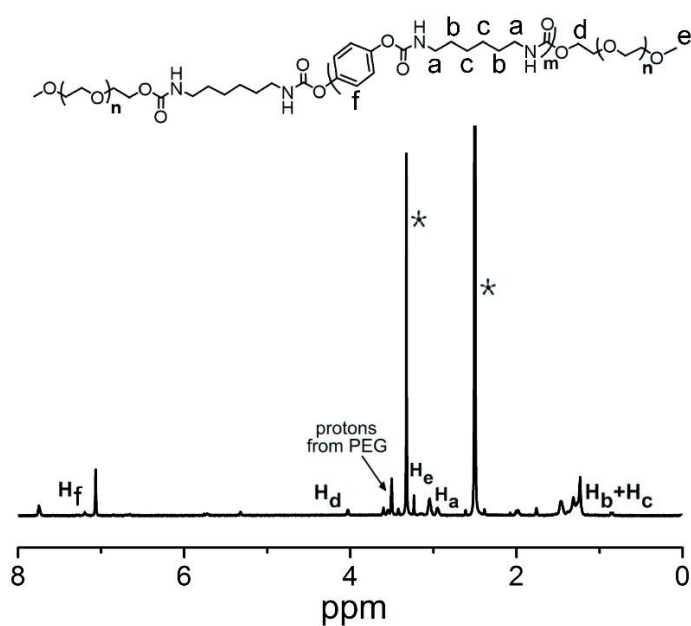

**Fig. S2** <sup>1</sup>H NMR spectrum of **PU2** in DMSO-*d*<sub>6</sub> (\* indicates peaks from the solvent and water)

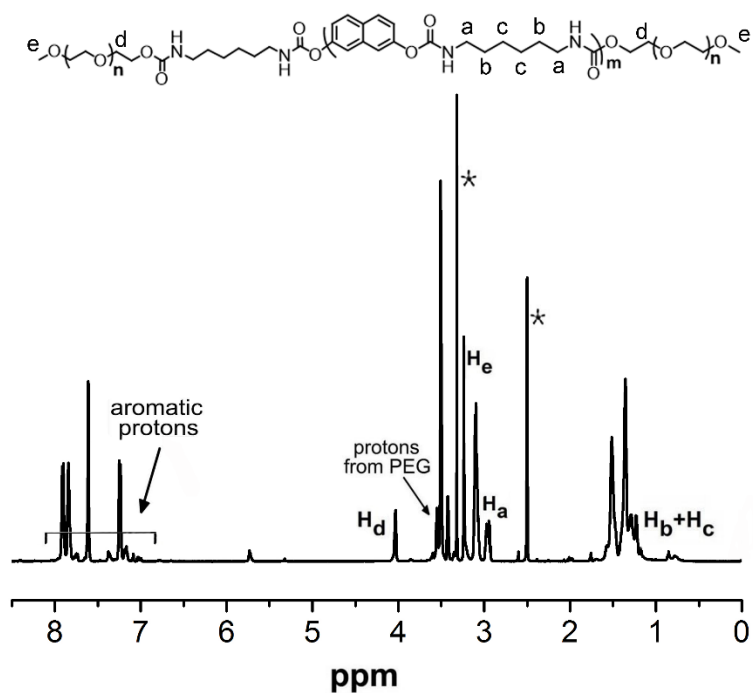

**Fig. S3**  $^1\text{H}$  NMR spectrum of **PU3** in  $\text{DMSO-}d_6$  (\* indicates peaks from the solvent and water).

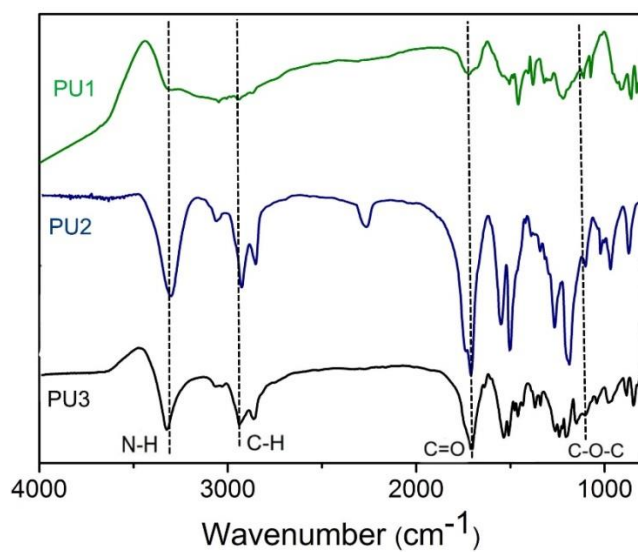

**Fig. S4** FTIR spectra of **PU1**, **PU2** and **PU3**.

### 3. Photophysical properties and interactions of PUs with nitro-aromatic analytes

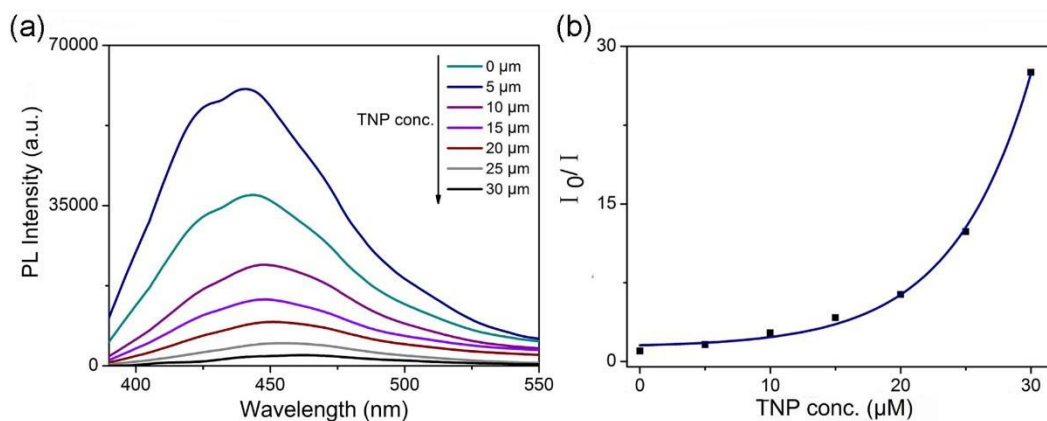

**Fig. S5** (a) PL spectra of **PU2** (10  $\mu\text{M}$ ) in acetonitrile–water ( $v/v = 1:1$ ) solution containing different amounts of TNP. (b) Corresponding Stern–Volmer plot of TNP.

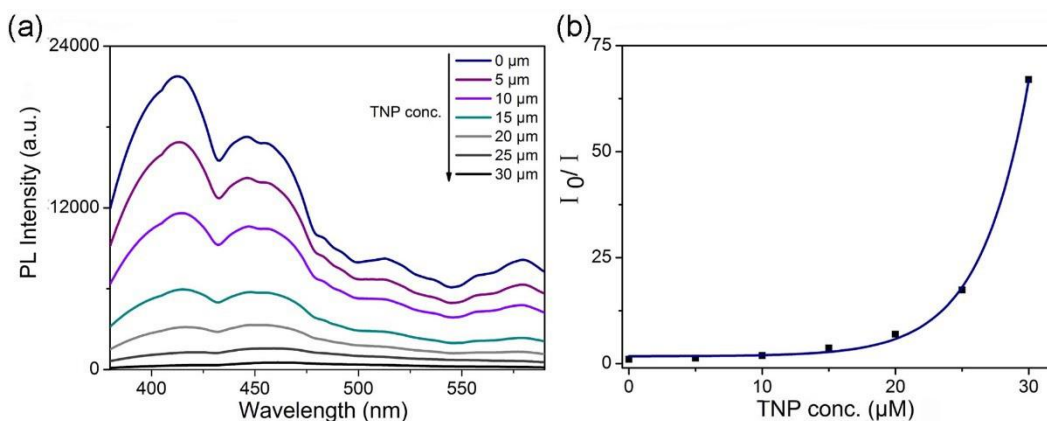

**Fig. S6** (a) PL spectra of **PU3** (10  $\mu\text{M}$ ) in acetonitrile–water ( $v/v = 1:1$ ) solution containing different amounts of TNP. (b) Corresponding Stern – Volmer plot of TNP.

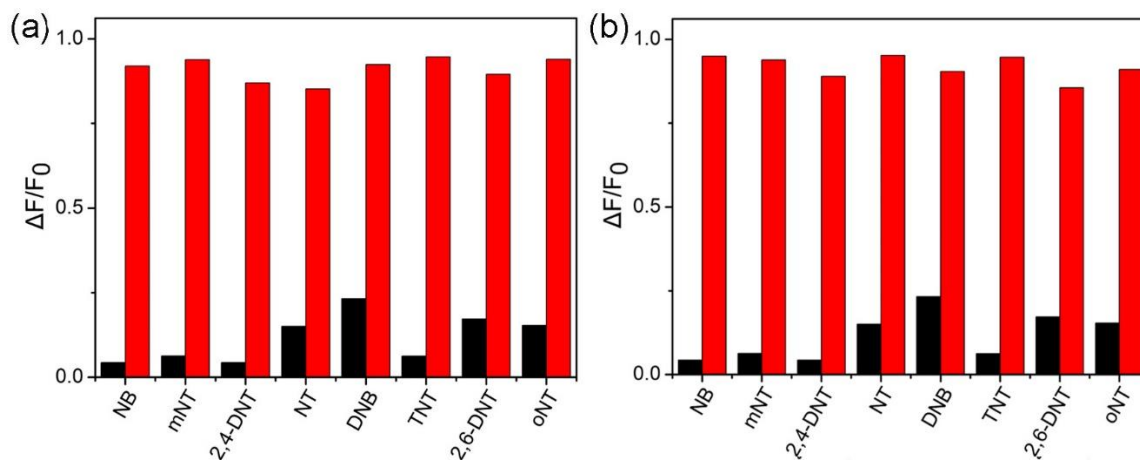

**Fig. S7** (a) Quenching efficiency of **PU2** (10  $\mu\text{M}$ ) with analytes (30  $\mu\text{M}$ ) in acetonitrile–water ( $v/v = 1:1$ ) solution before (black) and after (red) the addition of TNP (30  $\mu\text{M}$ ). (b) Quenching efficiency of **PU3** (10  $\mu\text{M}$ ) with analytes (30  $\mu\text{M}$ ) in acetonitrile–water ( $v/v = 1:1$ ) solution before (black) and after (red) the addition of TNP (30  $\mu\text{M}$ ).

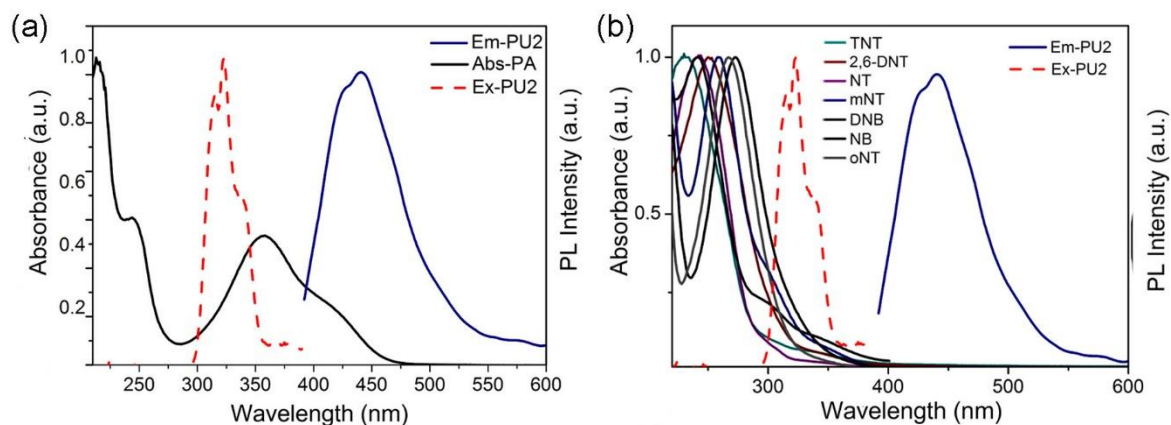

**Fig. S8** (a) Normalized absorption spectrum of TNP and excitation/emission spectra of **PU2**. (b) Overlap between emission spectra of **PU2** and absorption spectra of various nitro-aromatics.

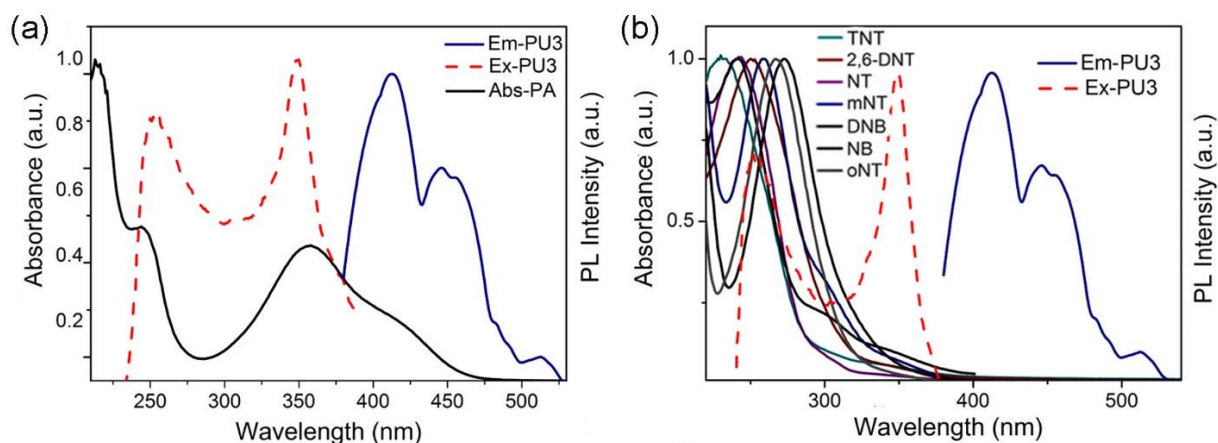

**Fig. S9** (a) Normalized absorption spectrum of TNP and excitation/emission spectra of **PU3**. (b) Overlap between emission spectra of **PU3** and absorption spectra of various nitro-aromatics.

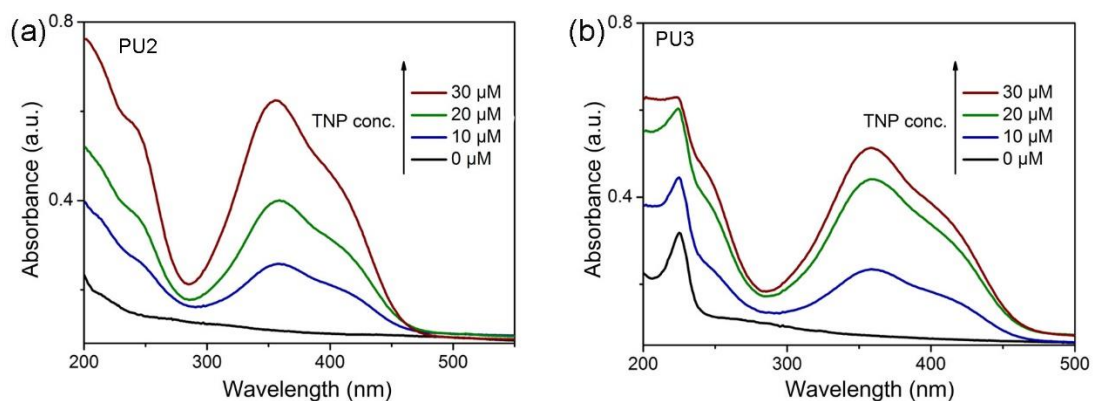

**Fig. S10** UV-visible spectra of **PU2** (a) and **PU3** (b) ( $1 \times 10^{-5}$  M) with increasing concentration of TNP.



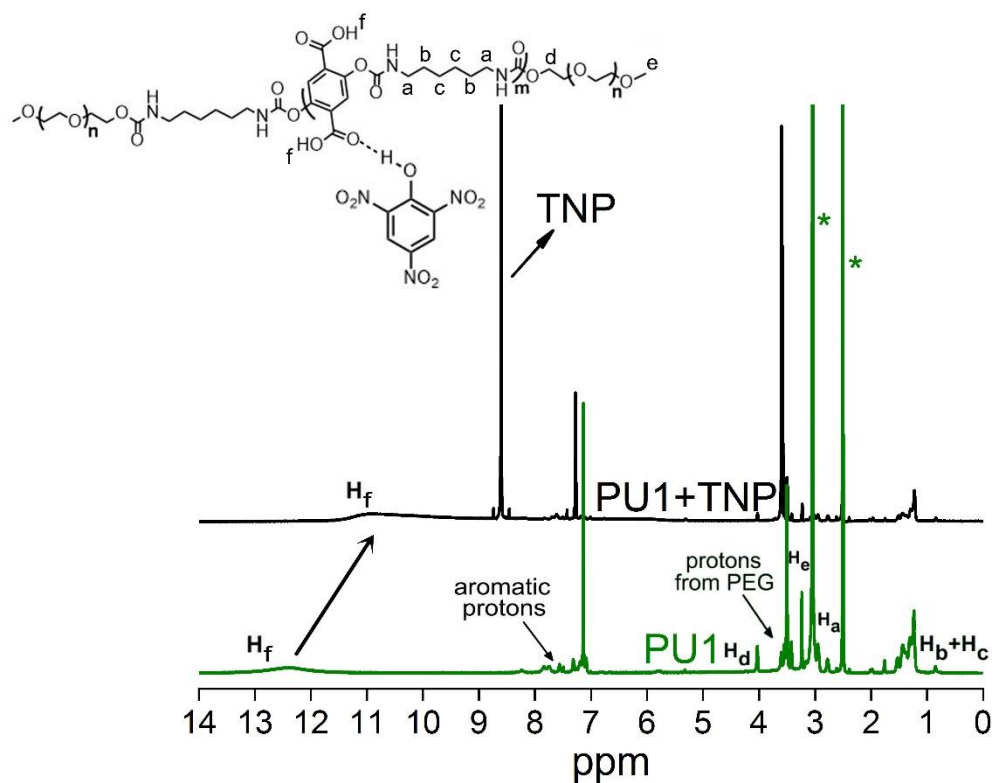

**Fig. S11** <sup>1</sup>H NMR spectra of **PU1** before and after addition of 1 equivalent of TNP in DMSO-*d*<sub>6</sub>.

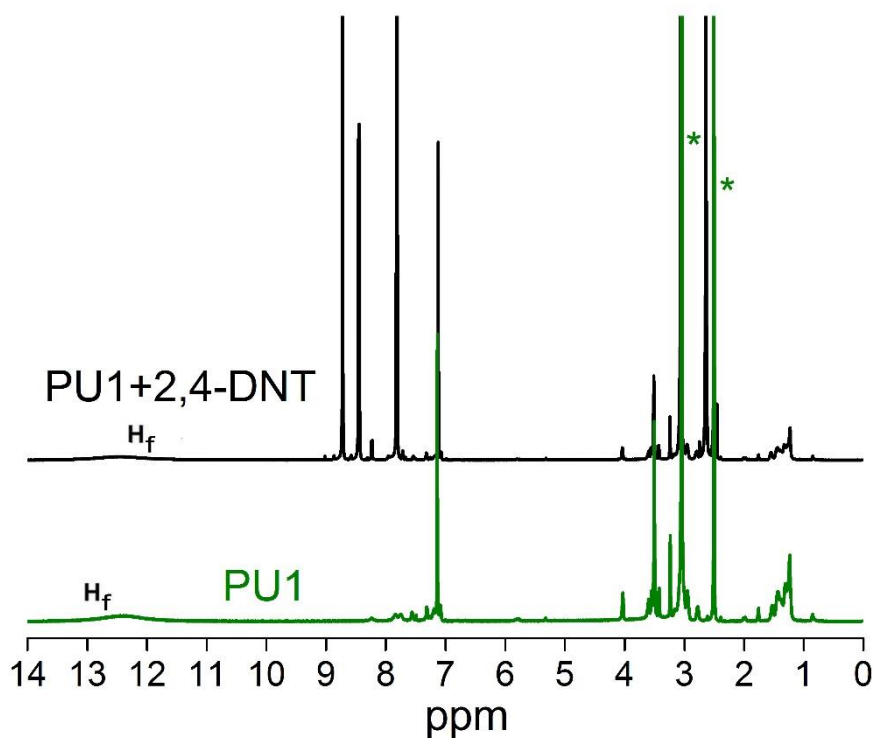

**Fig. S12** <sup>1</sup>H NMR spectra of **PU1** before and after addition of 1 equivalent of 2,4-DNT in DMSO-*d*<sub>6</sub>.

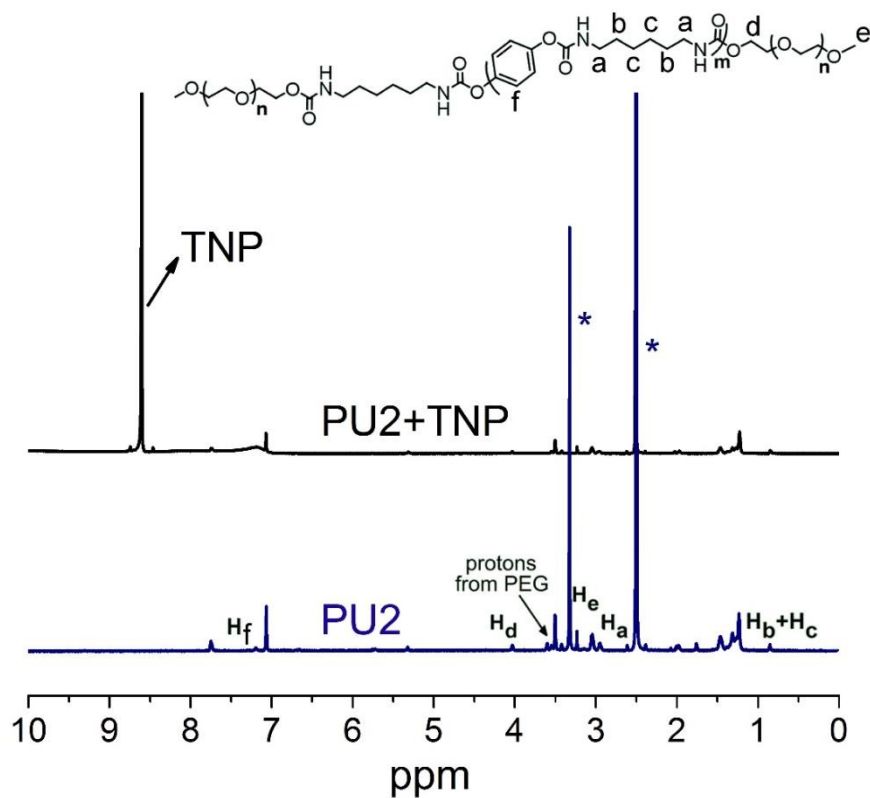

**Fig. S13** <sup>1</sup>H NMR spectra of **PU2** before and after addition of 1 equivalent of 2,4-DNT in DMSO-*d*<sub>6</sub>.

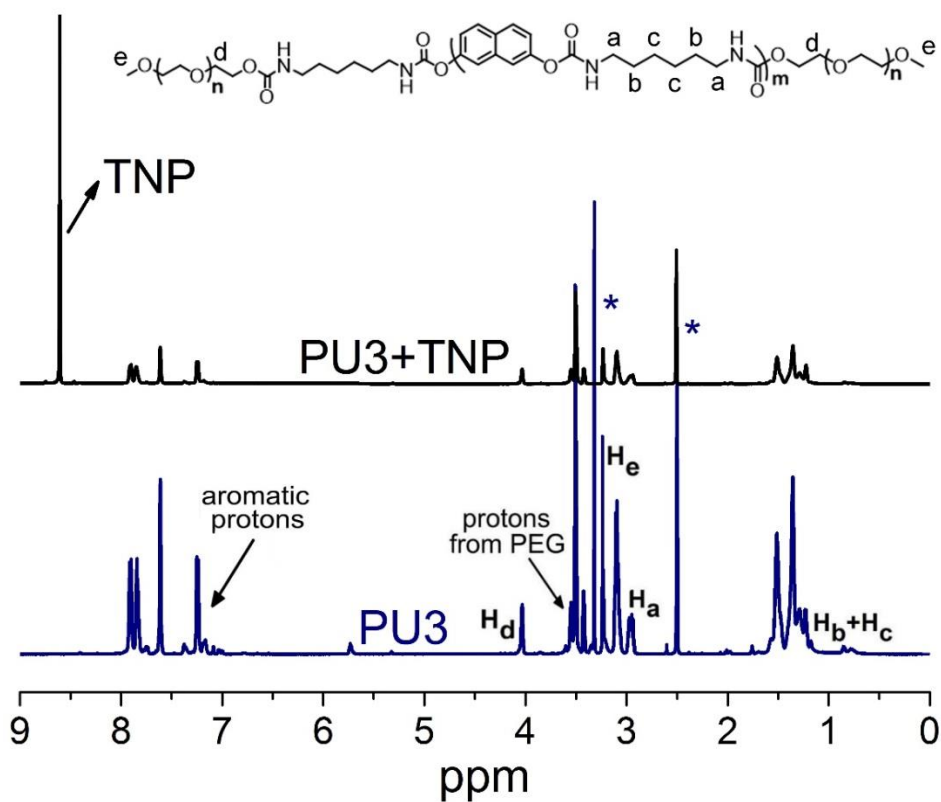

**Fig. S14** <sup>1</sup>H NMR spectra of **PU3** before and after addition of 1 equivalent of 2,4-DNT in DMSO-*d*<sub>6</sub>.

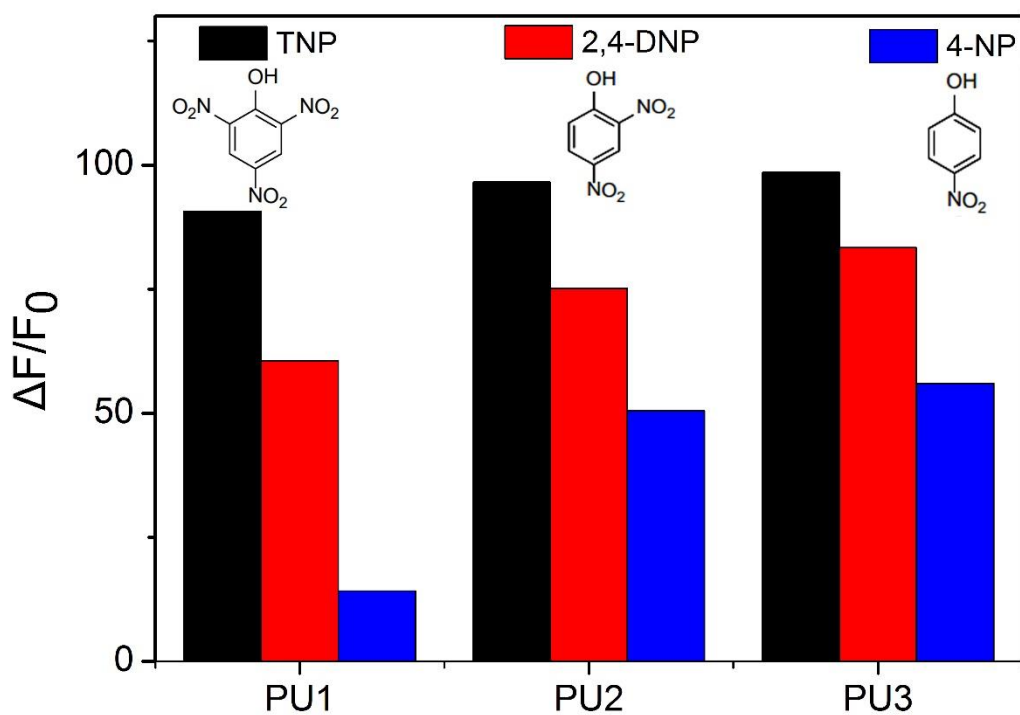

**Fig. S15** Comparison of the fluorescence quenching of PUs caused by the addition of various nitrophenols (TNP, 2,4-DNP and 4-NP) (30  $\mu\text{M}$ ) in acetonitrile–water (v/v = 1:1) solution.

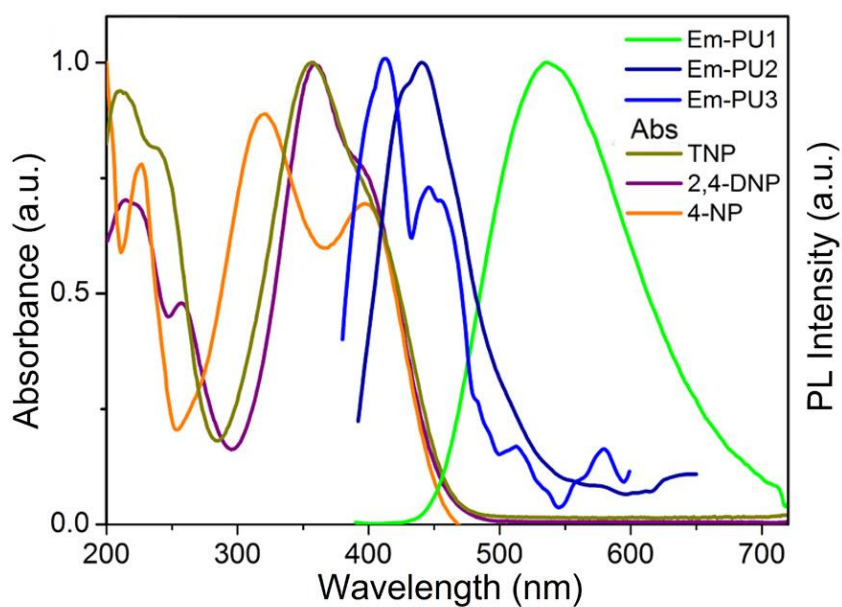

**Fig. S16** Overlap between emission spectra of PUs and absorption spectra of various nitro-aromatics.

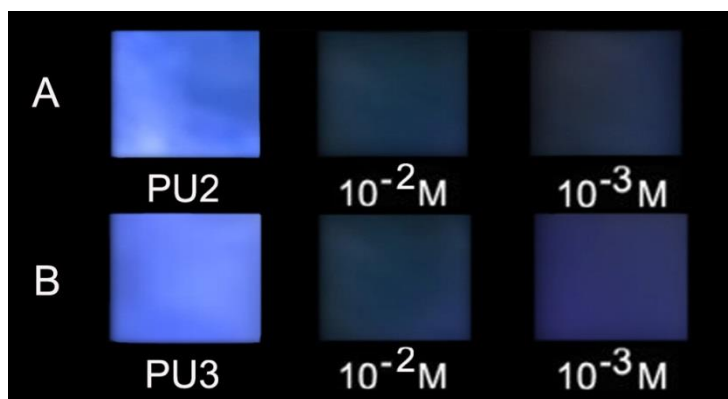

**Fig. S17** (A) Luminescent photographs of **PU2**-coated filter paper with addition of different concentrations of TNP (10  $\mu$ L) water solutions. (B) Luminescent photographs of **PU3**-coated filter paper with addition of different concentrations of TNP (10  $\mu$ L) water solutions. All photographs were taken under 365 nm UV illumination.
